## Supplementary Figure 1

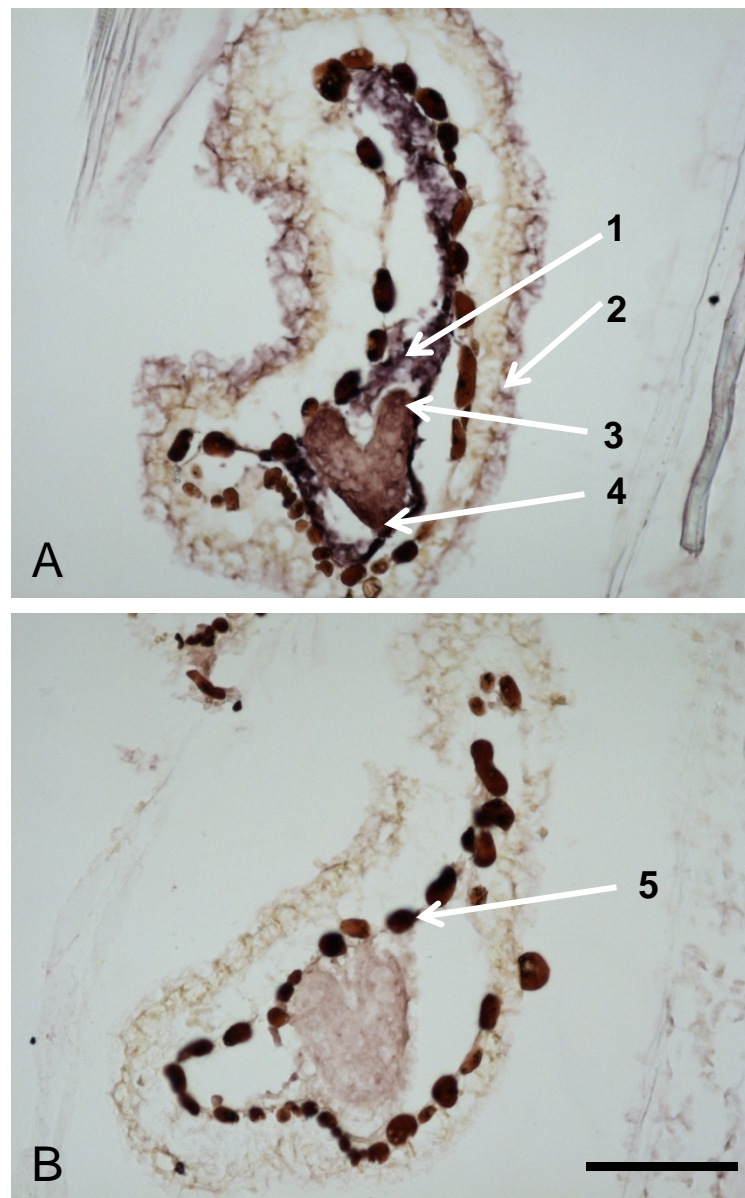

**Fig. S1. *ICE1* antisense and sense probe hybridization to wild-type seed sections.**

Expression of *ICE1* during early wild-type seed development A) Antisense probe, showing strong staining in the embryo surrounding endosperm (1), testa (2) and some staining in the embryonic cotyledons (3) and root pole.(4). B) Sense probe, showing only artefactual dark colouration of the endothelium (5). Scale bar = 100 $\mu$ m.

Supplementary Figure 2

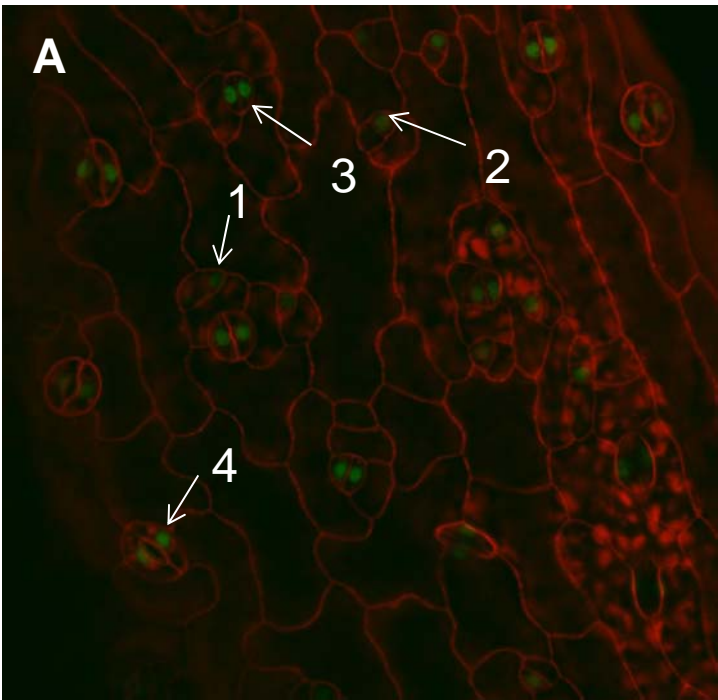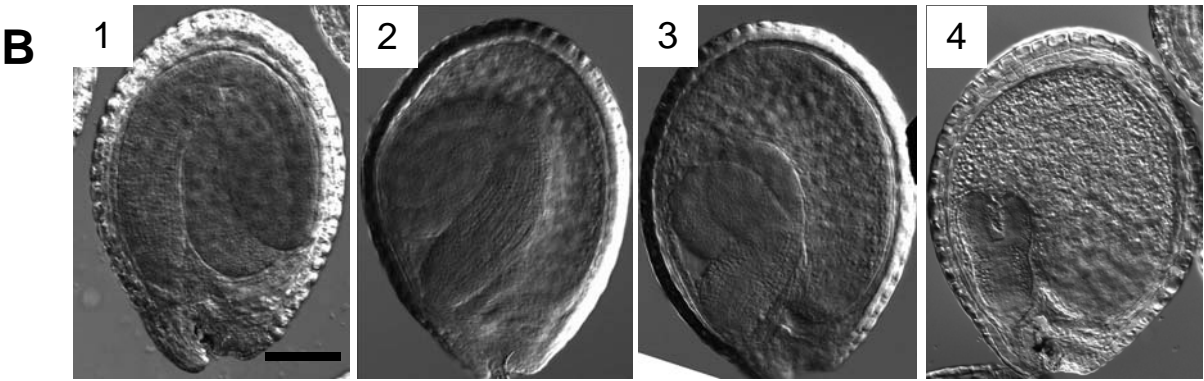

|                           |     |   |   |    |
|---------------------------|-----|---|---|----|
| <i>ice1-2/ICE1</i>        | 92  | 0 | 0 | 28 |
| <i>ice1-2/ICE1</i> (36-A) | 97  | 0 | 1 | 6  |
| <i>ice1-2/ICE1</i> (36-D) | 87  | 7 | 9 | 5  |
| <i>ice1-2/ICE1</i> (32-8) | 102 | 0 | 2 | 8  |

**Fig. S2. The *ice1-2* endosperm persistence phenotype is complemented by an ICE1:GFP fusion protein.** The promoter of *ICE1*, including the 5'UTR, was amplified with the primers *pICE1F* and *pICE1R* and then cloned into pENTR5'-MCS, an entry vector containing a multiple cloning site, as a BamH1 NotI fragment (Lee et al., 2006). The *ICE1* ORF without the stop codon was amplified with *ICE1ORFF* and *ICE1ORFR* and cloned into pENTR/D-TOPO (Invitrogen). A triple LR recombination using the resulting two plasmids and pENTR R2-L3-GFP S65C+stop (as described in (Fobis-Loisy et al., 2007; Heim et al., 1995)) was then carried out into the destination vector pART27 (Gleave et al., 1992), to give *pICE1:ICE1-GFP*. Five independent homozygous transgenic lines carrying one copy of the transgene were generated, and expression of the transgene was monitored in the stomatal lineage by confocal microscopy (Supplemental Figure 2). The lines showing the strongest expression levels were crossed to *ice1-2*, and the seeds of T1 individuals carrying the transgene and heterozygous for *ice1-2* and were scored for the *ice1-2* seed shrivelling phenotype.

- A) Analysis of fusion protein expression from the *pICE1-ICE1-GFP* construct used in complementation studies showing nuclear localized GFP signal in 1) meristemoids, 2) guard mother cells (GMC), 3) newly divided GMCs and 4) newly differentiated stomata in the epidermal cell layer of a young leaf. This expression pattern reflects exactly that shown in (Kanaoka et al. 2008).
- B) Complementation of the *ice1-2* seed phenotype by the introduction of *pICE1-ICE1-GFP* construct. Siliques from three independent F1 progeny of crosses between *ice1-2* homozygotes and either independent homozygous *pICE1-ICE1-GFP* transgenic lines or Col-0 were cleared and pooled for each experiment. Seeds were divided into four phenotypic classes 1) Wild-type, 2 and 3) intermediate and 4) *ice1*. Results are consistent with complementation by 36-A and 32-8, and partial complementation by 36-D. (Fisher's exact test confidence >99.0% in each case). Scale bar = 100µm.

## References

- Fobis-Loisy, I., Chambrier, P. and Gaude, T. (2007). Genetic transformation of *Arabidopsis lyrata*: specific expression of the green fluorescent protein (GFP) in pistil tissues. *Plant Cell Rep* 26, 745-53.
- Gleave, A. P. (1992). A versatile binary vector system with a T-DNA organisational structure conducive to efficient integration of cloned DNA into the plant genome. *Plant Mol Biol* 20, 1203-7.
- Heim, R., Cubitt, A. B. and Tsien, R. Y. (1995). Improved green fluorescence. *Nature* 373, 663-4.
- Lee, J. Y., Colinas, J., Wang, J. Y., Mace, D., Ohler, U. and Benfey, P. N. (2006). Transcriptional and posttranscriptional regulation of transcription factor expression in *Arabidopsis* roots. *Proc Natl Acad Sci U S A* 103, 6055-60.

Supplementary Figure 3

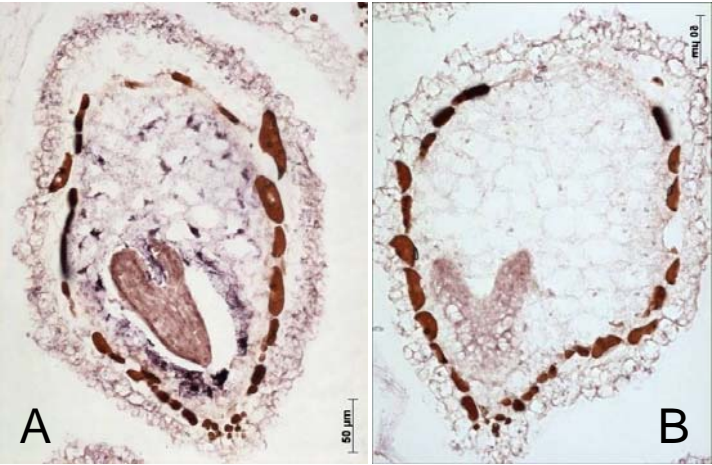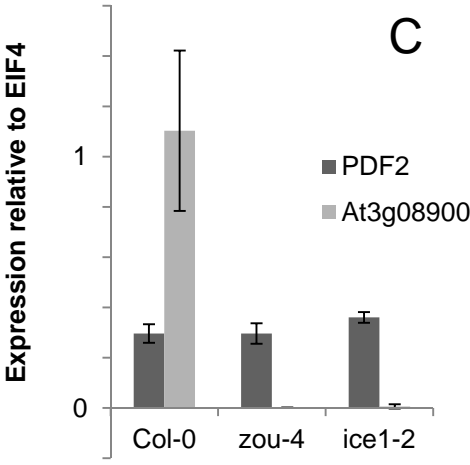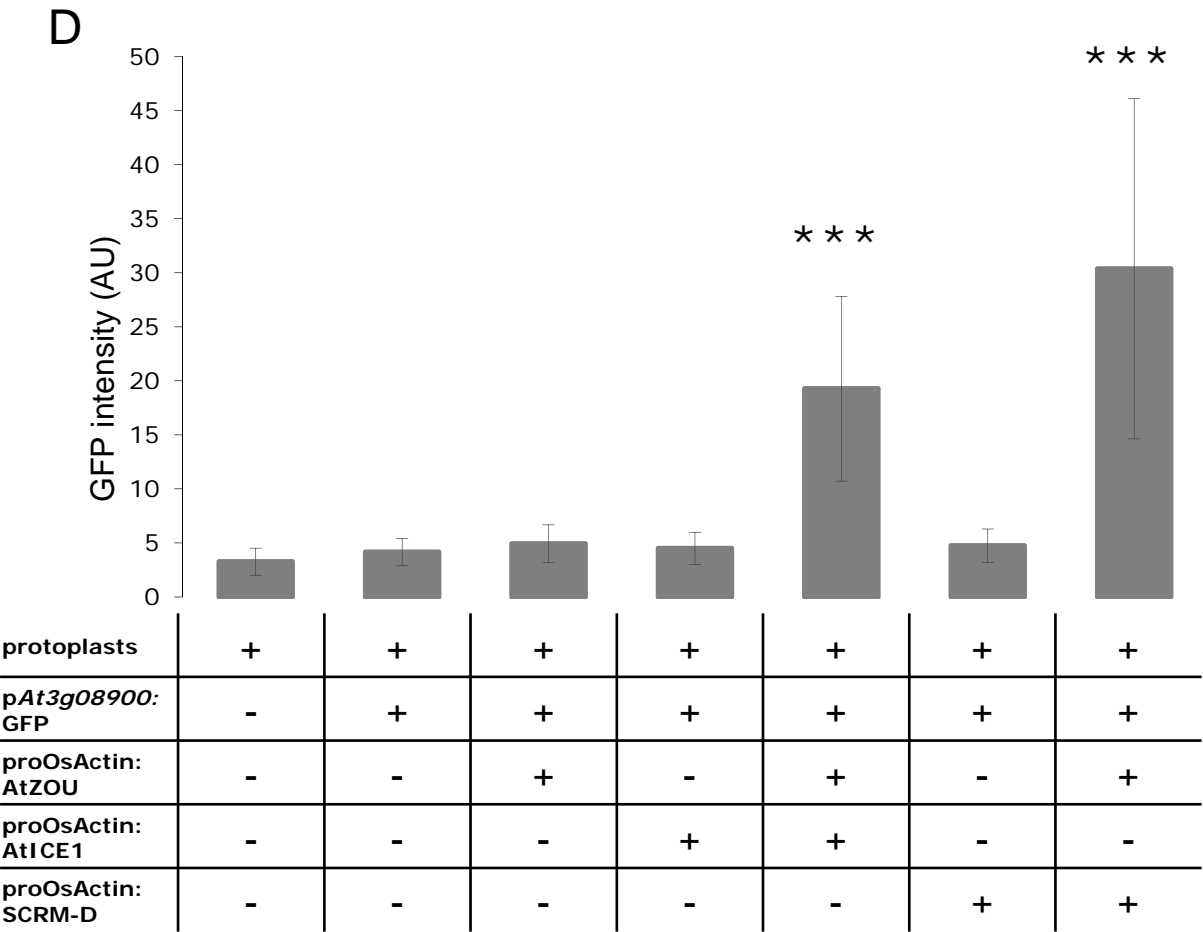

**Fig. S3. ZOU and ICE1 form heterodimers to activate target gene expression.**

Expression of *At3g08900* in the endosperm of a wild-type seed (A) and *zou-4* mutant seed (B). C) qRT-PCR expression data for *PDF2* (control) and *At3g08900* in the developing siliques of wild-type, *zou-4* and *ice1-2* mutants. D) Study of *At3g08900* promoter activities. The *ZOU* ORF, and the *ICE1* ORF or *SCRM-D* ORF were amplified from cDNA prepared from either wild-type or *SCRM-D* siliques using the primers AtZouF and AtZouR, or AtIce1F and AtIce1R respectively, and recombined directly into pDONOR221 (Invitrogen) using Gateway™ technology. ORFs were then recombined into the destination vector *pBS Tpp-A* (Thévenin et al., 2012) which allows constitutive expression in protoplasts under a rice actin gene promoter. The promoter of *At3g08900* was amplified from wild-type genomic DNA with the primers *p At3g08900F* and *p At3g08900R* and recombined into pDONOR221 (Invitrogen) using Gateway™ technology. This was then recombined into the plasmid *pBS Tpp-B* (Thévenin et al., 2012), upstream of a promoterless GFP-encoding ORF. Different combinations of purified plasmids were transformed into protoplasts, and resulting promoter activity was quantified using flow cytometry as described in Thévenin et al., 2012. Green fluorescent protein (GFP) intensities (arbitrary units) measured in *P.patens* protoplasts co-transfected with 5µg of each vector alone or in combination, compared with nontransfected protoplasts, are presented. Transactivation activities were monitored from three biological repetitions by GFP fluorescence quantification using flow cytometry. t-test significance: \*\*\*,  $P < 0.001$ . Error bars indicate Standard Deviation. Scale bar = 50µm.

**Table S1. Primers used in this study**

| Primer                    | Sequence                                             |
|---------------------------|------------------------------------------------------|
| <i>ICE T-DNA F</i>        | AATCTGATGGCTGAGAGGAGAA                               |
| <i>ICE T-DNA R</i>        | TTCATGGTAGCGAGCAACAGAC                               |
| <i>SALK LB</i>            | ATTTGCCGATTTTCGGAAC                                  |
| <i>1g71250cdsFor</i>      | CACCATGAACACAAACAGAAAGAAGATG                         |
| <i>1g71250cdsRev</i>      | GTGAAGGAGTGTCATCTGTTGG                               |
| <i>2g43870cdsFor</i>      | CACCATGGCTTCACTTCTTGTCTC                             |
| <i>2g43870cdsRev</i>      | TAGACAATTTGGCTGAAAAAATC                              |
| <i>At3g38000cdsFor</i>    | CACCTTTATAACTCATGATGACGTCATCCCATCA                   |
| <i>At3g38000cdsRev</i>    | TGATAATTGATAATTAGAGCAGAGCATTATTATTAGCATT             |
| <i>ICE1-Q-L</i>           | GTTTGCCTTGGATGTTTTCC                                 |
| <i>ICE1-Q-R</i>           | GCTTTGATTTGATCAGGCAGT                                |
| <i>ICE 5' YEAST</i>       | TGGCCATTACGGCCATGGGTCTTGACGGAAACAATGG                |
| <i>ICE 3' YEAST BAIT</i>  | CGACATGGCCGAGGCGGCCAAGATCATACCAGCATACCCTGC           |
| <i>ICE 3' YEAST PREY</i>  | CGAGAGGCCGAGGCGGCCGTACATACCAGCATACCCTGC              |
| <i>ICE-SHORT YEAST 5'</i> | TGGCCATTACGGCCGGGGGAGATATGGATGAGACT                  |
| <i>ZOU 5' YEAST</i>       | TGGCCATTACGGCCATGACTAATGCTCAAGAGTTGGG                |
| <i>ZOU-SHORT YEAST 5'</i> | TGGCCATTACGGCCATATCAAACCATCCCATAGACGC                |
| <i>ZOU 3' YEAST BAIT</i>  | CGACATGGCCGAGGCGGCCAATAGAGATGAAAAATATAACACCAG        |
| <i>ZOU 3' YEAST PREY</i>  | CGAGAGGCCGAGGCGGCCAATAGAGATGAAAAATATAACACCAG         |
| <i>AtZouF</i>             | GGGGACAAGTTTGTACAAAAAAGCAGGCTTTATGACTAATGCTCAAGAGT   |
| <i>AtZouR</i>             | GGGGACCACTTTGTACAAGAAAGCTGGGTTTTATAGAGATGAAAAATATA   |
| <i>Atlce1F</i>            | GGGGACAAGTTTGTACAAAAAAGCAGGCTTTATGGGTCTTGACGGAAACAA  |
| <i>Atlce1R</i>            | GGGGACCACTTTGTACAAGAAAGCTGGGTTTCAGATCATACCAGCATAC    |
| <i>p At3g08900F</i>       | GGGGACAAGTTTGTACAAAAAAGCAGGCTTTGGAAAGCTGCCCCTATTGAGA |
| <i>p At3g08900R</i>       | GGGGACCACTTTGTACAAGAAAGCTGGGTTTTGAAACGACAAGGAAGA     |
| <i>pICE1F</i>             | AAGGAAAAAAGCGCCGCAAAGCAAATTAAGTGGTTCTA               |
| <i>pICE1R</i>             | CGCGGATCCCGCCAAAGTTGACACCTTTAC                       |

|                 |                           |
|-----------------|---------------------------|
| <i>ICE1ORFF</i> | CACCATGGGTCTTGACGGAAACAAT |
| <i>ICE1ORFR</i> | GCAGGGTATGCTGGTATGATC     |
